# Supplementary material for: Development and validation of a risk stratification model for screening suspected cases of COVID-19 in China
Source: Aging (Albany NY). 2020 Jul 29;12(14):13882–94. doi: 10.18632/aging.103694 (PMC7425460; doi:10.18632/aging.103694)
Supplement: Supplementary Figures [file aging-12-103694-s002..pdf]

## SUPPLEMENTARY FIGURES

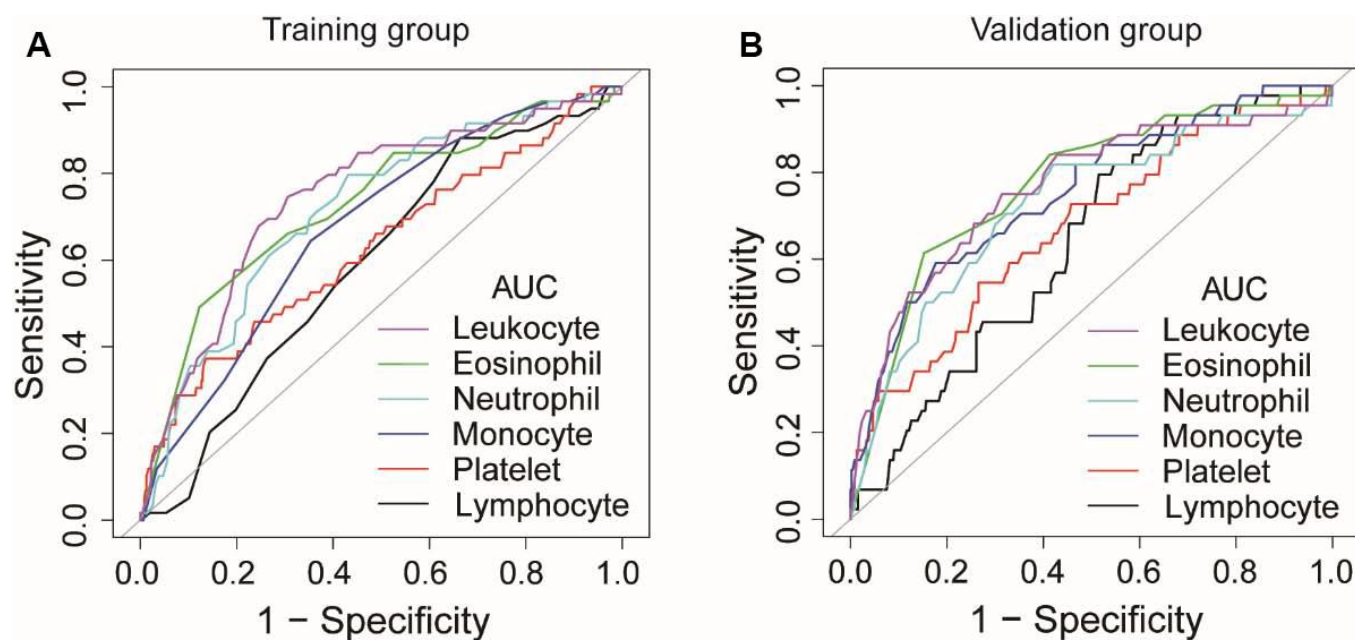

**Supplementary Figure 1.** AUROC of leukocyte, monocyte, lymphocyte, eosinophil, neutrophil and platelets in COVID-19 diagnosis. (A) training group; (B) validation group.

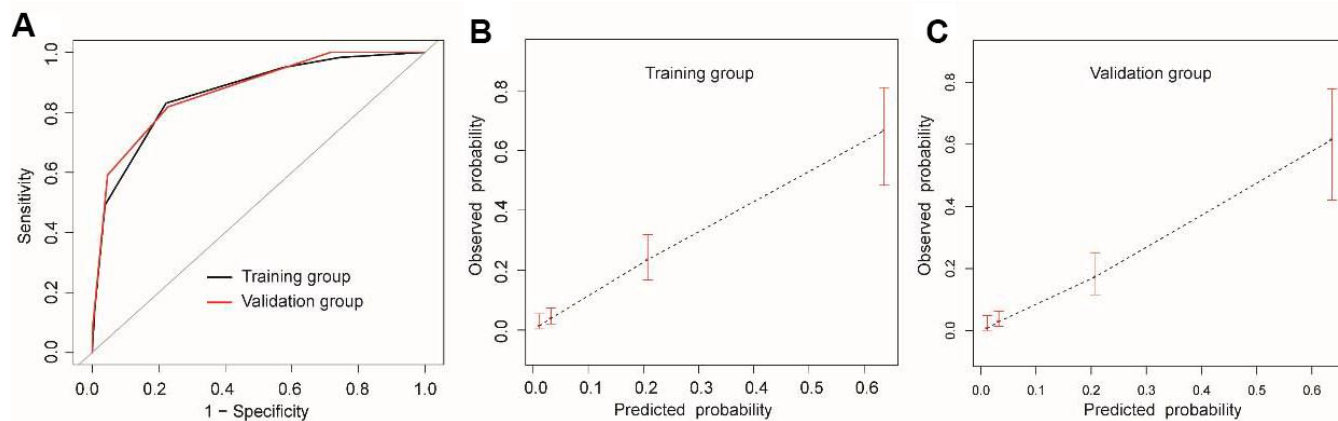

**Supplementary Figure 2.** AUROC of model in COVID-19 diagnosis (A), and Calibration chart for predicted versus observed probability (B, C) in training and validation group.
