# Supplementary material for: Development and validation of a risk stratification model for screening suspected cases of COVID-19 in China
Source: publisher site journal article supplement (doi:10.18632/aging.103694), 2020-07-29
Supplement: Supplementary file [file aging-v12i14-103694-supplementary-material-SD2.pdf]

## SUPPLEMENTARY TABLES

**Supplementary Table 1. Characteristics of patients with SARS-CoV-2 infected.**

| Characteristic                             | Development group      | Validation group       | P-value |
|--------------------------------------------|------------------------|------------------------|---------|
| Number                                     | 59                     | 44                     |         |
| Female                                     | 24 (40.68%)            | 15 (34.09%)            | 0.495   |
| Age (years)                                | 47 (38-56)             | 48 (35-57)             | 0.812   |
| Symptom                                    |                        |                        |         |
| Fever                                      | 37 (62.71%)            | 32 (72.73%)            | 0.285   |
| Dry cough                                  | 24 (40.68%)            | 18 (40.91%)            | 0.981   |
| Fatigue                                    | 6 (10.17%)             | 4 (9.09%)              | 0.855   |
| Pharyngalgia                               | 14 (23.73%)            | 8 (18.18%)             | 0.497   |
| Blood parameters                           |                        |                        |         |
| Leucocyte (10 <sup>9</sup> /L)             | 5.10 (4.05-6.05)       | 4.50 (3.63-6.03)       | 0.738   |
| hsCRP (mg/L)                               | 10.17 (2.62-21.88)     | 14.80 (5.35-30.10)     | 0.043   |
| Monocyte (10 <sup>9</sup> /L)              | 0.40 (0.30-0.50)       | 0.35 (0.27-0.52)       | 0.224   |
| RBC (10 <sup>12</sup> /L)                  | 4.70 (4.25-5.01)       | 4.69 (4.22-5.01)       | 0.88    |
| Hematocrit (%)                             | 0.42 (0.38-0.45)       | 0.42 (0.38-0.44)       | 0.668   |
| Lymphocyte (10 <sup>9</sup> /L)            | 1.10 (0.85-1.50)       | 1.10 (0.73-1.30)       | 0.134   |
| MCH (pg)                                   | 30.60 (29.65-31.30)    | 30.15 (29.30-31.33)    | 0.439   |
| MCHC (g/L)                                 | 341.00 (334.00-346.50) | 341.00 (334.50-348.00) | 0.939   |
| MPV                                        | 10.40 (9.90-10.85)     | 10.35 (9.95-11.00)     | 0.707   |
| Basophilicgranulocyte (10 <sup>9</sup> /L) | 0.01 (0.01-0.02)       | 0.01 (0.00-0.01)       | 0.066   |
| Eosinophil (10 <sup>9</sup> /L)            | 0.01 (0.00-0.03)       | 0.00 (0.00-0.02)       | 0.757   |
| Hemoglobin (g/L)                           | 144.00 (129.00-153.00) | 143.00 (129.00-152.00) | 0.641   |
| PDW (%)                                    | 12.00 (11.20-13.10)    | 11.90 (10.73-13.03)    | 0.403   |
| Platelet (10 <sup>9</sup> /L)              | 192.00 (144.50-234.00) | 177.00 (140.00-226.00) | 0.4     |
| Platelet hematocrit (%)                    | 0.20 (0.15-0.23)       | 0.18 (0.15-0.24)       | 0.453   |
| Neutrophil (10 <sup>9</sup> /L)            | 3.40 (2.60-4.45)       | 3.00 (2.18-4.15)       | 0.981   |
| Radiological evidence of pneumonia         | 24 (40.68%)            | 19 (43.18%)            | 0.799   |

Abbreviations: HsCRP: high-sensitivity C-reactive proteins; RBC: Red Blood Cell; MCH: mean corpuscular hemoglobin; MPV: Mean platelet volume; MCHC: mean corpuscular hemoglobin concentration; PDW: Platelet distribution width; CT, chest computed tomography scan.

**Supplementary Table 2. Characteristics of patients visited fever clinics.**

| Characteristic                             | Non-COVID-19 infected  | COVID-19 infected      | P-value |
|--------------------------------------------|------------------------|------------------------|---------|
| Number                                     | 452                    | 44                     |         |
| Female                                     | 217 (48.01%)           | 15 (34.09%)            | 0.077   |
| Age (years)                                | 31 (25-38)             | 48 (35-57)             | <0.001  |
| Symptom                                    |                        |                        |         |
| Fever                                      | 335 (74.12%)           | 32 (72.73%)            | 0.841   |
| Dry cough                                  | 153 (33.85%)           | 18 (40.91%)            | 0.347   |
| Fatigue                                    | 39 (8.63%)             | 4 (9.09%)              | 0.917   |
| Pharyngalgia                               | 81 (17.92%)            | 8 (18.18%)             | 0.966   |
| Blood parameters                           |                        |                        |         |
| Leucocyte (10 <sup>9</sup> /L)             | 7.20 (5.50-9.50)       | 4.50 (3.63-6.03)       | <0.001  |
| hsCRP (mg/L)                               | 8.80 (2.40-22.22)      | 14.80 (5.35-30.10)     | 0.547   |
| Monocyte (10 <sup>9</sup> /L)              | 0.57 (0.43-0.78)       | 0.35 (0.27-0.52)       | <0.001  |
| RBC (10 <sup>12</sup> /L)                  | 4.74 (4.38-5.14)       | 4.69 (4.22-5.01)       | 0.068   |
| Hematocrit (%)                             | 0.42 (0.40-0.46)       | 0.42 (0.38-0.44)       | 0.042   |
| Lymphocyte (10 <sup>9</sup> /L)            | 1.29 (0.87-1.76)       | 1.10 (0.73-1.30)       | 0.004   |
| MCH (pg)                                   | 30.30 (29.50-31.20)    | 30.15 (29.30-31.33)    | 0.442   |
| MCHC (g/L)                                 | 339.00 (332.00-344.00) | 341.00 (334.50-348.00) | 0.046   |
| MPV                                        | 9.95 (9.30-10.60)      | 10.35 (9.95-11.00)     | <0.001  |
| Basophilicgranulocyte (10 <sup>9</sup> /L) | 0.02 (0.01-0.03)       | 0.01 (0.00-0.01)       | <0.001  |
| Eosinophil (10 <sup>9</sup> /L)            | 0.03 (0.01-0.09)       | 0.00 (0.00-0.02)       | 0.002   |
| Hemoglobin (g/L)                           | 144.00 (132.00-156.00) | 143.00 (129.00-152.00) | 0.177   |
| PDW (%)                                    | 11.20 (10.10-12.45)    | 11.90 (10.73-13.03)    | 0.15    |
| Platelet (10 <sup>9</sup> /L)              | 214.00 (176.00-260.00) | 177.00 (139.75-226.00) | <0.001  |
| Platelet hematocrit (%)                    | 0.22 (0.18-0.25)       | 0.18 (0.15-0.24)       | 0.002   |
| Neutrophil (10 <sup>9</sup> /L)            | 4.90 (3.50-7.22)       | 3.00 (2.18-4.15)       | <0.001  |
| Radiological evidence of pneumonia         | 44 (9.73%)             | 19 (43.18%)            | <0.001  |

Abbreviations: HsCRP: high-sensitivity C-reactive proteins; RBC: Red Blood Cell; MCH: mean corpuscular hemoglobin; MPV: Mean platelet volume; MCHC: mean corpuscular hemoglobin concentration; PDW: Platelet distribution width; CT, chest computed tomography scan.
